# Supplementary material
Source: HighWire-hosted journal article supplement (https://cmaj.ca/highwire/filestream/71699/field_highwire_adjunct_files/0/181238-health-events-and-work-online.pdf)
Supplement: 181238-health-events-and-work-online.pdf [file 181238-health-events-and-work-online.pdf]

# ACUTE HEALTH EVENTS AND WORK EARNINGS

## A VISUAL RESEARCH ABSTRACT

### STUDY POPULATION

24 567 patients were matched with 3 016 500 controls by retrospectively linking hospital and income tax data from 2005 to 2013.

### OBJECTIVE

Assess the effect of acute myocardial infarction, cardiac arrest and stroke on work and earnings 3 years after the event.

### THIRD YEAR POSTEVENT VERSUS CONTROLS

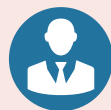

Patients working

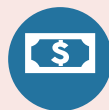

Work earnings

### ACUTE MYOCARDIAL INFARCTION

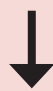

5 percentage points

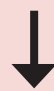

\$3834

### CARDIAC ARREST

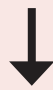

13 percentage points

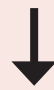

\$11 143

### STROKE

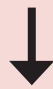

20 percentage points

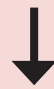

\$13 278

### GREATER EFFECTS ON INCOME FOR:

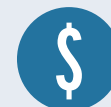

Lower baseline earnings

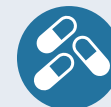

Comorbid disease

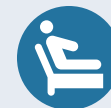

Longer stay in hospital

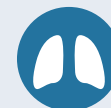

Needed mechanical ventilation

Loss of earnings following cardiovascular and cerebrovascular events has consequences for patients, families, employers and governments.
